# Supplementary material
Source: Springer Nature journal article supplement (https://www.springerprofessional.de/resource/supplementary/13638_2011_473_MOESM5_ESM.pdf/11897796)
Supplement: MOESM5 [file 11897796]

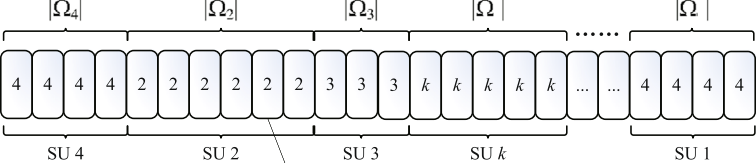

In shadow particle structure, each element represents a user index, For example, the 9th sub-channel is preallocated to user 2
